# Supplementary material for: Exploring Response to Immunotherapy in Non-Small Cell Lung Cancer Using Delta-Radiomics
Source: MDPI journal article supplement (doi:10.3390/cancers14020350), 2022-01-11
Supplement: s1 [file s1]

## Supplementary Materials

**Table S1.** Delta-radiomic features calculated with the Absolute difference method that resulted statistically different in the 3 response classes. The results are presented as median values for each class and p-values.

| Absolute Difference |                                |                      |                        |                      |         |
|---------------------|--------------------------------|----------------------|------------------------|----------------------|---------|
| Class               | Name                           | PD                   | PR                     | SD                   | p-Value |
| firstorder          | TotalEnergy                    | $-6,060 \times 10^9$ | $1,046 \times 10^{11}$ | $-1,200 \times 10^7$ | 0.0212  |
| gldm                | DependenceNonUniformity        | -37,24               | 676,5                  | -39,31               | 0.0415  |
| gldm                | GrayLevelNonUniformity         | -341,5               | 2328                   | -63,22               | 0.0277  |
| glcm                | Contrast                       | 0,1798               | -0,3042                | 0,2766               | 0.0326  |
| glrlm               | GrayLevelNonUniformity         | -122,3               | 1175                   | -55,45               | 0.0387  |
| glrlm               | RunLengthNonUniformity         | -509,3               | 3777                   | -250,3               | 0.0329  |
| glszm               | ZoneVariance                   | -3847                | 34668                  | -794,1               | 0.0237  |
| glszm               | LargeAreaEmphasis              | -3835                | 34908                  | -846,4               | 0.0234  |
| glszm               | LargeAreaLowGrayLevelEmphasis  | -72,54               | 159,0                  | -1,676               | 0.0165  |
| glszm               | LargeAreaHighGrayLevelEmphasis | -17371               | $1,496 \times 10^7$    | -59729               | 0,0276  |

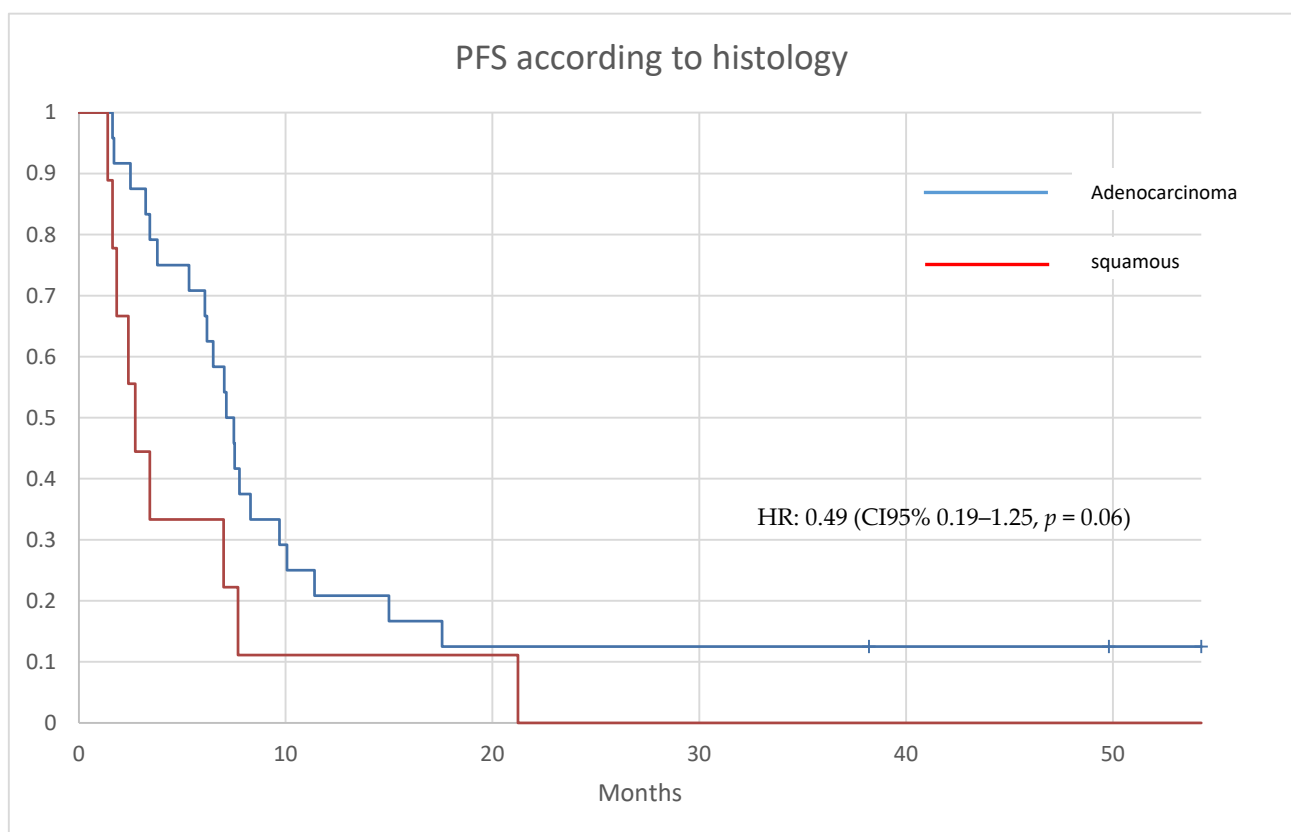

**Figure S1.** Univariate analysis of progression free survival (PFS) according to histology.

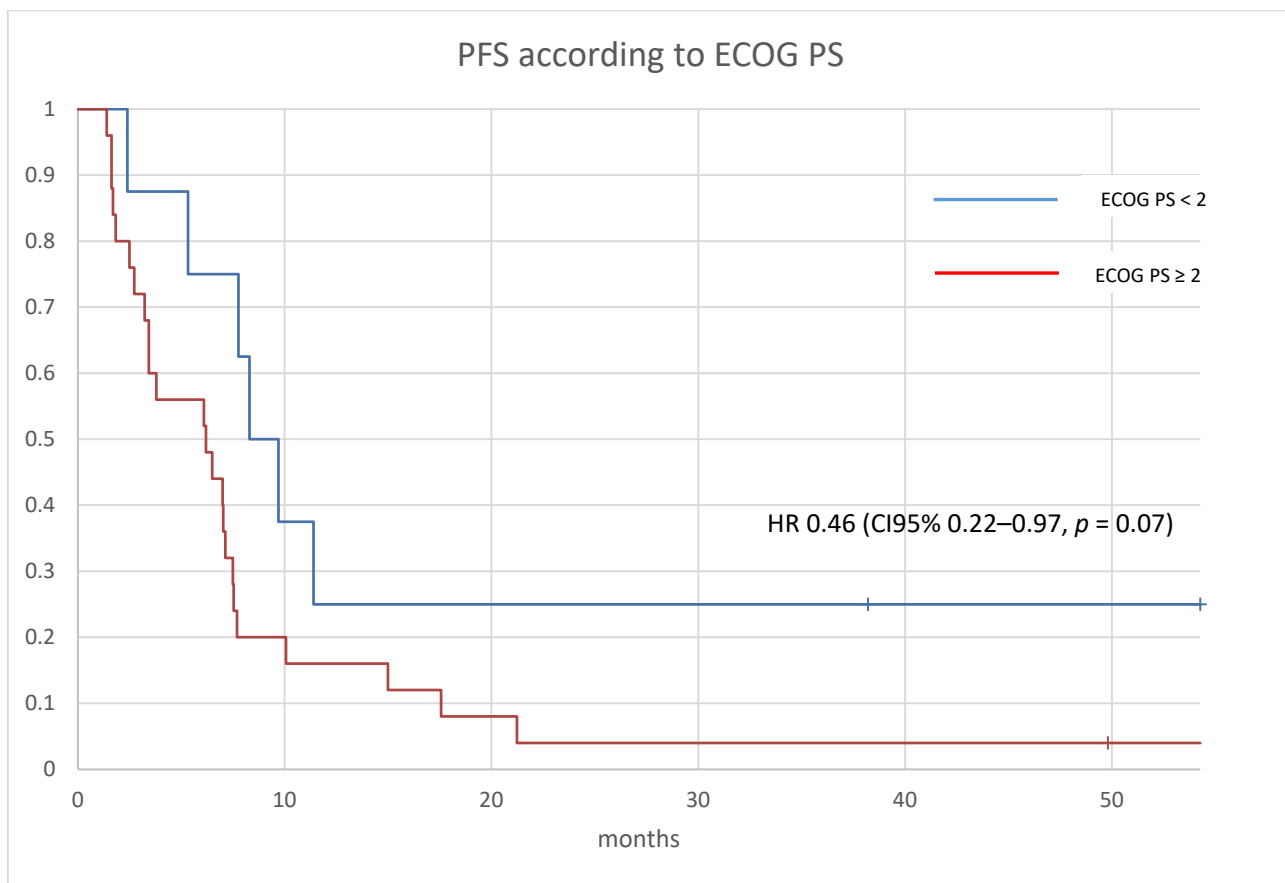

**Figure S2.** univariate analysis of progression free survival according to the eastern cooperative oncology group (ECOG PS).

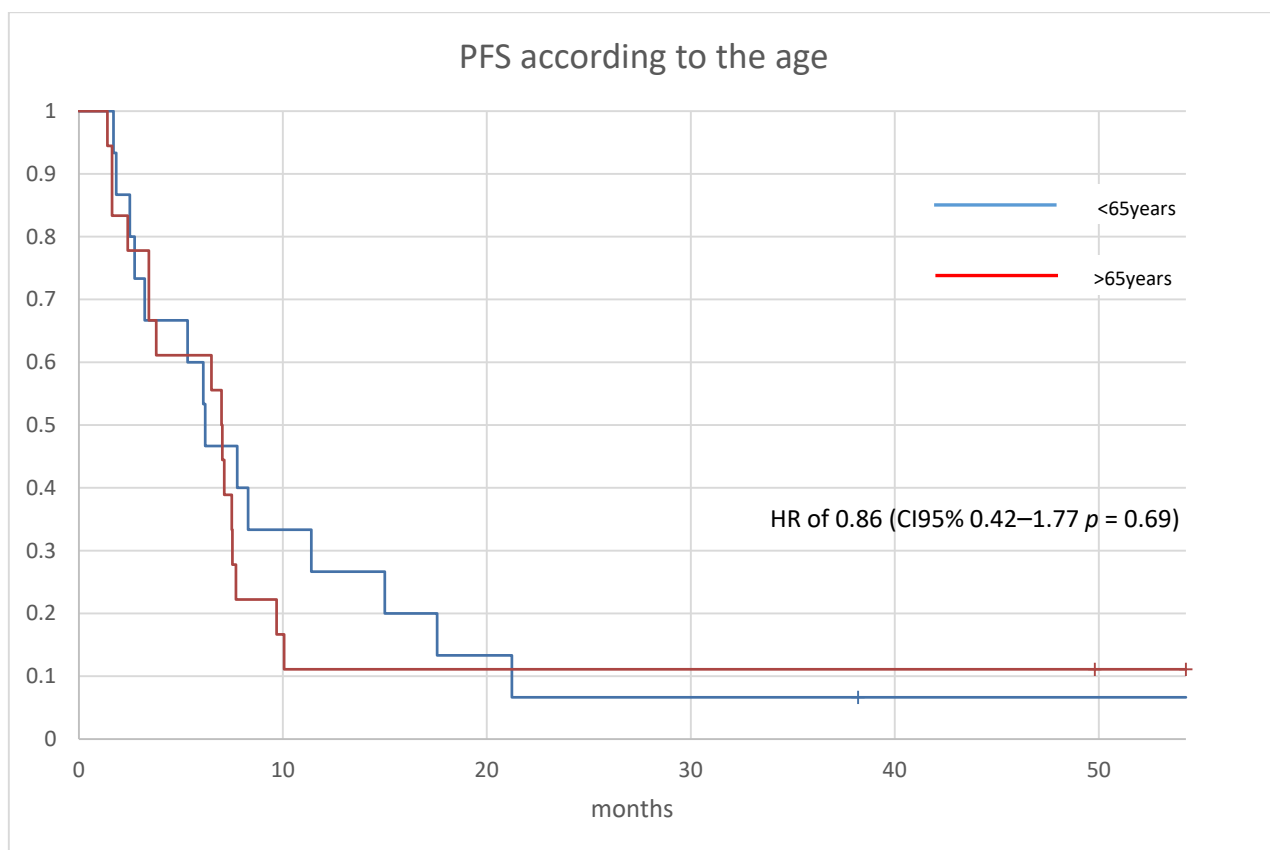

**Figure S3.** univariate analysis of progression free survival (PFS) according to the age.
